# Supplementary material for: Effect of Acupuncture on Artery Elasticity for Atherosclerosis: A Randomized Controlled Trial
Source: Research Square preprint supplement (doi:10.21203/rs.3.rs-1120988/v1), 2022-01-14
Supplement: Supplementary file 1 [file 066a21eb34928e0e1e840d08.docx]

**Research protocol**

**Project summary**

Atherosclerotic diseases are a class of predominantly cardiovascular illnesses that have a high incidence and a worldwide distribution. Acupuncture has a definite effect in improving ischemic stroke motor recovery and reducing the frequency of angina attacks. However, evidence for how acupuncture treatment exactly impacts on promoting atherosclerotic vessels is still lacking. According to previous studies and observations in clinical practice, acupuncture may improve arterial elasticity. Therefore, the purpose of this study is to evaluate the effect of acupuncture on arterial elasticity through objective indicators such as ultrasound and blood tests.

This randomized parallel controlled trial will include 78 participants. The participants will be assigned in a 1:1 ratio to acupuncture group and sham acupuncture group. Participants will complete 24 acupuncture treatments within 12 weeks intervention and 12 weeks follow-up. The primary outcome will be the carotid-artery systolic and diastolic pulse wave velocity (ufPWV). The secondary outcome will be the intima-media thickness (IMT), blood lipids. Intention-to-treat (ITT) and per-protocol (PP) data sets will be included in the statistics. All data statistics will be analyzed using SPSS 20.0 software.

We hypothesize that acupuncture treatment could improve arterial elasticity and improve vascular compliance, reduce endothelial damage. The improvement of elasticity may be regulated by vascular endothelial factors.

**General information**

- Effect of Acupuncture on Artery Elasticity for Atherosclerosis: Protocol for a Randomized Controlled Trial
- The Second Affiliated Hospital of Guangzhou University of Chinese Medicine, Guangzhou, Guangdong Province, China, Wen-Bin Fu; [fuwenbin@139.com](mailto:fuwenbin@139.com), Tel:18819480340.

**Rationale & background information**

Atherosclerosis (AS) is a chronic arterial disease. Main pathological features are thickening of the arterial intima-media and the formation of plaques. Atherosclerosis related diseases, like myocardial infarctions (MI) and many strokes, as well as disabling peripheral artery diseases have the highest mortality and disability rate [1]. The development of atherosclerosis is a complicated process. inflammation, oxidative stress reaction and hemodynamic factors could slowly damage endothelial cells functions, thus attract low-density lipoprotein (LDL), cholesterol (CT) and platelets stagnate to the local damaged sites in early subclinical atherosclerosis [2,3].

In current review [4], plaque progression is an essential intermediary step linking early subclinical atherosclerosis to an acute plaque rupture event. Arterial stiffness and endothelial dysfunction are early manifestations of hypertension and subclinical atherosclerosis. As reported [5]，arterial stiffness and endothelial dysfunction are related to declined cerebral blood flow，the presence of intracranial stenotic plaque and greater volume of white matter hyperintensity (WMH). Therefore, early detection of subclinical atherosclerosis and restriction of its progression by timely intervention could constitute an important step toward cardiovascular disease prevention. It is recommended that management approaches for peripheral artery disease need earlier diagnosis and intervention [6]. A systematic review compared pulse wave velocity (PWV) in subjects with and without statins has shown that short-term statin therapy has a favorable effect on improvement of arterial stiffness compared to placebo [7].

Acupuncture is considered a beneficial alternative treatment for hypertension and chronic stable angina with little adverse effects [8]. Acupuncture also reduced brachial and aortic blood pressure (BP), wave reflection and arterial stiffness in middle-age hypertensive individuals [9]. However, limited evidence exists regarding the effects of acupuncture on arterial stiffness of subclinical atherosclerosis and further investigation is wanted. Therefore, this trial aims to assess effect of acupuncture on artery elasticity for atherosclerosis. We hope acupuncture could improve arterial stiffness in subclinical atherosclerosis and resist plaque progression.

**References (of literature cited in preceding sections)**

1. Libby P, Buring JE, Badimon L, et al. Atherosclerosis. Nat Rev Dis Primers. 2019;5(1):56. Published 2019 Aug 16. doi:10.1038/s41572-019-0106-z

2. Bäck M, Yurdagul A Jr, Tabas I, Öörni K, Kovanen PT. Inflammation and its resolution in atherosclerosis: mediators and therapeutic opportunities. Nat Rev Cardiol. 2019;16(7):389-406. doi:10.1038/s41569-019-0169-2

3. Souilhol C, Serbanovic-Canic J, Fragiadaki M, et al. Endothelial responses to shear stress in atherosclerosis: a novel role for developmental genes. Nat Rev Cardiol. 2020;17(1):52-63. doi:10.1038/s41569-019-0239-5

4. Ahmadi A, Argulian E, Leipsic J, Newby DE, Narula J. From Subclinical Atherosclerosis to Plaque Progression and Acute Coronary Events: JACC State-of-the-Art Review. J Am Coll Cardiol. 2019;74(12):1608-1617. doi:10.1016/ j. jacc.2019.08.012

5. Liu W, Chen Z, Ortega D, et al. Arterial elasticity, endothelial function and intracranial vascular health: A multimodal MRI study. J Cereb Blood Flow Metab. 2021;41(6):1390-1397. doi:10.1177/0271678X20956950

6. Kithcart AP, Beckman JA. ACC/AHA Versus ESC Guidelines for Diagnosis and Management of Peripheral Artery Disease: JACC Guideline Comparison. J Am Coll Cardiol. 2018;72(22):2789-2801. doi: 10.1016/j.jacc.2018.09.041

7. Upala S, Wirunsawanya K, Jaruvongvanich V, Sanguankeo A. Effects of statin therapy on arterial stiffness: A systematic review and meta-analysis of randomized controlled trial. Int J Cardiol. 2017; 227:338-341. doi:10.1016/ j. ijcard.2016.11.073

8. Z Zhao L, Li D, Zheng H, et al. Acupuncture as Adjunctive Therapy for Chronic Stable Angina: A Randomized Clinical Trial. JAMA Intern Med. 2019;179(10):1388-1397. doi: 10.1001/ jamainternmed.2019.2407

9. Terenteva N, Chernykh O, Sanchez-Gonzalez MA, Wong A. Acupuncture therapy improves vascular hemodynamics and stiffness in middle-age hypertensive individuals. Complement Ther Clin Pract. 2018; 30:14-18. doi: 10.1016/j.ctcp.2017.11. 002

**Study goals and objectives**

The objective of this study is to assess the effect of acupuncture on arterial elasticity via ultrafast pulse wave velocity(ufPWV) and explore the effect of acupuncture on lipid level and platelet function for subclinical atherosclerosis patients.

**Study design**

The study was a single-blind, double-arm, parallel-design RCT and was randomized into a TA group and a SA group two groups in a 1:1 ratio.

**Methodology**

Participants

Recruitment advertisements were disseminated via social media and Outpatient departments in the hospital. Interested patients could consult us by provided phone number or Wechat account. A research assistant would explain the research contents to patients and get the informed consent form signed; Subsequently, the patients would be assigned to undergo carotid ultrasound examination for free. After the screening, Eligible patients would be included according to ultrasound results and demographic information (including age, gender, BMI, blood pressure, whist line, smoking habit, comorbidity and family history).

Eligibility criteria: Carotid ultrasound examinations (at least one side IMT≥1.0 mm, and both side IMT≤1.5 mm) were required for eligibility before inclusion. To be considered eligible, patients had to comply with the following: Age: 20 -70 years old; Volunteer to take part in the study and signed informed consent form; Good understanding of the trail; Without any other treatment for atherosclerosis in the past 2 weeks (i.e., asprin, plavix, fibrates, statins etc.).

Exclusion criteria: Risk of 10 years’ cardio-cerebrovascular disease≥20% [10]; History of acute cerebrovascular events, or severe trauma or major surgery, other serious diseases; Mental disorders; Skin diseases and bleeding disorders; Fear of acupuncture; Pregnant women or lactating women; Severe diabetes, skin irritation, or acute skin lesion.

Randomization

Patients who meet the inclusion criteria will be randomly assigned to TA group and SA group in a 1:1 ratio.

Sequence generation: Randomization was conducted by SPSS software (20.0 ver. IBM SPSS Statistics, IBM Crop, Somers, New York, USA). The allocation sequence was computer-generated with RV. UNIFORM (0,100), set seed=20190901.

Implementation: The random numbers and random cards were produced and stored by Guangdong Provincial Hospital of Traditional Chinese Medicine, Acupuncture Research Centre. Each randomly generated serial number was put into an opaque envelope. These envelopes were allocated to corresponding patients by researchers according to sequential order after inclusion.

Blinding

Considering the specificity of the acupuncture treatment, this trial cannot blind the acupuncturists. Each stage including recruitment, intervention, sample collection, ultrasound examination and follow-up, will be carried out independently by different staffs. Patients, data collectors, statistical analysts and ultrasound physicians were all blinded in this trial.

Interventions

Patients were randomly divided into two groups: TA group and SA group. Each group’s acupuncture points were the same. The selection and location of acupoints were consistent with the WHO acupuncture point positioning criteria (As shown in the table and figure of Supplement 3 eAppendix 2) [11]. The interventions were implemented by 4 experienced and trained acupuncturists under the Clinical Research Acupuncture Operation Standard (STRICTA) [12]. Patients in both groups received a total of 24 treatments twice per week for 12 weeks.

TA group

Before treatment, patients were asked to have a rest in a warm and comfortable environment. The acupuncturist sterilized his hands and patient’s skin with 75% alcohol. Next, the acupuncturist located acupuncture points and pasted customized foam pads (1*1*1 cm3 in size) with a hollow tube on the skin. Hwato brand disposable sterile needles (size 0.25*25 mm) were used to pass the tube and then penetrate into skin through the foam pad in the order of Neiguan (PC6), Yanglingquan (GB34), Renying (ST9), Baihui (DU20) and Yintang (EX-HN3). The depth was between 0.5-1.0 cm according to patients’ body shape. The needles were retained for 30 minutes. Finally, the needles were removed without bleeding.

SA group

The environment demand, acupoints, procedures, retention time and acupuncturists were the same as TA group. After sterilization, the acupuncturists covered the points with the same foam pads. Disposable sterile blunt needles (0.25*25 mm) that could not pierce the skin were applied in SA group (As shown in the table and figure of Supplement 3 eAppendix 2). Although blunt needles were inserted through the hollow tube and the foam pad and touched the patient’s skin, they could not puncture the skin surface. Therefore, the needles only produced a tingling sensation which was similar to true acupuncture.

Usual care

Patients in both groups received the healthy diet and lifestyle education during treatment periods according to 2020 Guidelines for primary prevention of cardiovascular disease in China [13]. Patients were allowed to receive treatments that were not related to atherosclerosis or other cardiovascular diseases and recorded in CRFs truthfully.


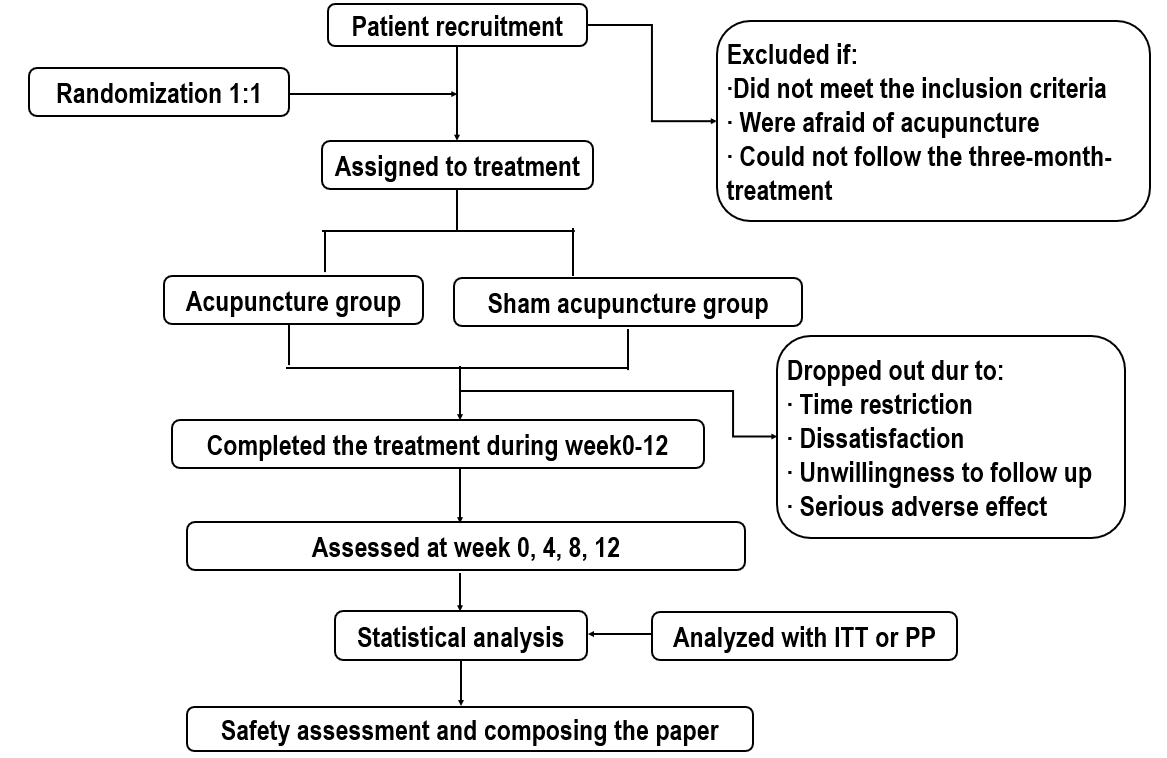


**Safety considerations**

All treatments in this trail will be performed by professional and qualified acupuncturists to ensure medical quality and safety. Some adverse reactions, such as bleeding, pain, swelling, and other discomforts, may occur during the treatments. Such adverse reactions are rare events; however, if occur, they will be recorded in the participant's medical records, including the time of occurrence, symptoms, degree and whether they are related to acupuncture. The measures and results of managing adverse events should also be recorded in detail in a case report form (CRF). Serious adverse events will be reported to the Ethics Committee of Guangdong Provincial Hospital of Chinese Medicine.

**Follow-up**

There is no follow-up period setting to the research participants, but patients will be able to contact us via Wechat group online if any adverse event occurs.

**Data management and statistical analysis**

Each part of the study is under the responsibility of the dedicated person, and there will not be any work overlap between the different parts. The main researcher will create a quality-monitoring group to regularly monitor the progress and quality of each part of the research, the group members have access to make the final decision to terminate the trial but will not involve in other parts of the research. Two of the researchers will collect, summarize, and enter the data blindly and independently. The third researcher will confirm the data verification and correction. All data will be stored in the form of photographs, hard-copy reports, and spreadsheets. ResMan Research Manager, the public platform for clinical-trial data management, will be used for data collection and administration.

Statistical analysis

ITT principle was applied to all participants who have received at least one treatment. As uncompleted patients, missing data was imputed using the last-observation-carried-forward method. Data statistics were runed with SPSS 20.0 software (IBM SPSS Statistics, IBM Crop, Somers, New York, USA) with a set of 95% confidence interval and 2-sided significance level of less than 0.05.

For baseline data, the consistency between two groups will be compared by T test or Mann-Whitney U test. Continuous variables (age, BMI, blood pressure, waistline) were presented by mean and standard deviation if meet normal distribution, otherwise would be presented by mean (median, range) and categorical variables (sex, family history, co-morbidity, smoking habit and medication) were presented by composition ratio. For primary and secondary outcome, t test was used if continuous variables conformed to the normal distribution and uniform variance. Otherwise, we used corrected t-test or two-sample nonparametric tests. Categorical variables were analysed by chi-square test or Fisher’s exact test. When P is less than 0.05, it will be defined as having a significant difference. The same approach was used for changes in PWV and cIMT at weeks 4, 8, and 12.

**Quality assurance**

This trial will also set up a data monitoring committee, which will be led by experts with professional clinical research experience who are members of the acupuncture research team of Guangdong Provincial Hospital of Chinese Medicine. The experts of the data monitoring committee will regularly supervise the data collection, aggregation, and storage. Committee members will have no conflict of interest with the sponsor and funder of this research.

**Expected outcomes of the study**

Primary outcomes

The primary outcome was ultrafast pulse wave velocity (ufPWV), which is a shock wave caused by blood flow along the aorta to peripheral arteries during the contraction and dilatation phases of cardiac ejection. The primary outcome was measured by French Supersonic Aixplorer ultrasonic diagnostic instrument with the SL10-2 probe, frequency 2-10 Hz, vascular PWV mode. The sonographer selected 1-1.5 cm below the carotid bifurcation of the common carotid artery as measurement site. The indicators include the pulse wave velocity at begin-systole (BS, m/s) and at end-systole (ES, m/s), as well as the standard deviation (Δ±). If the standard deviation is more than 20% of the corresponding speed, the operation is deemed invalid, according to UFPWV operating guideline from Supersonic Aixplorer Company (details in supplement 4). Both sides carotid arteries were measured at least three times and then the researcher recorded the average PWV value by Excel.

Secondary outcomes

Carotid intima media thickness (cIMT): cIMT is a repeatable and convenient indicator of atherosclerosis as well as a vital indicator for predicting brain and cardiovascular events. According to Chinese Guideline for Ultrasound Examination of Blood Vessels, we defined IMT≥1.5 mm as local plaque formation. Intima - media thickened (at least one side IMT≥1.0 mm, and both side IMT≤1.5 mm) were required for eligibility before inclusion. Patients underwent IMT examinations before the first treatment and then at 4 weeks, 8 weeks and 12weeks.

Lipid level: lipid level indicators included cholestenone (TC), triglyceride (TG), high-density lipoprotein cholesterol (HDL), low-density lipoprotein cholesterol (LDL) and apolipoprotein (Apoa). The tests will be carried out by a third party, namely, the Department of Examination of Guangdong Provincial Hospital of Chinese Medicine.

Blood platelet (PLT) and fibrinogen (FIB): Blood platelet (PLT) and fibrinogen plays a vital role in endothelial impairment and plaque formation. Researches suggested that high PLT level patients were more likely to suffer from atherosclerosis or stroke. Fibrinogen is a Blood coagulation functional protein synthesized mainly by liver cells and is the most abundant coagulation factor in plasma. Fibrinogen is an important substrate and key step in thrombosis, and can stabilize the thrombosis structure. High fibrinogen is an important risk factor for various thrombotic diseases including atherosclerosis

Demographic and clinical baseline information at baseline

From patient record: age, sex, family history of cardiovascular disease, co-morbidity, smoking habit and all medication.

Measurements: BMI, blood pressure, waistline.

|  | **Table2. Outcome measurements at each timepoint** | | | | |
| --- | --- | --- | --- | --- | --- |
|  | **STUDY PERIOD** | | | | |
|  | **Enrolment** | **Allocation** | **Post-allocation** | | |
| **TIMEPOINT (week)** | ***-2*** | **0** | ***4*** | ***8*** | ***12*** |
| **ENROLMENT:** |  |  |  |  |  |
| **Eligibility screen** | X |  |  |  |  |
| ***2D ultrasound*** | X |  |  |  |  |
| **Exclusion criteria** | X |  |  |  |  |
| **Informed consent** | X |  |  |  |  |
| **Inclusion criteria** | X |  |  |  |  |
| **Allocation** |  | X |  |  |  |
| **INTERVENTIONS:** |  |  |  |  |  |
| ***TA*** |  |  |  |  |  |
| ***SA*** |  |  |  |  |  |
| **ASSESSMENTS:** |  |  |  |  |  |
| ***ufPWV*** |  | X | X | X | X |
| ***IMT*** |  | X | X | X | X |
| ***FIB*** |  | X | X | X | X |
| ***PLT*** |  | X | X | X | X |
| ***Apoa*** |  | X | X | X | X |
| ***TG*** |  | X | X | X | X |
| ***TC*** |  | X | X | X | X |
| ***LDL*** |  | X | X | X | X |
| ***HDL*** |  | X | X | X | X |
| ***Adverse events*** |  |  |  |  | X |

**Dissemination of results and publication policy**

All authors have read and approved this final manuscript for publication. The authors declared no potential conflicts of interest with respect to the research, authorship and publication of this article.

**Duration of the project**

Recruiting time of this trial was set from 01/09/2019 to 30/06/2020, and we will finish statistical analysis before 31/12/2020. The final outcome and article will be published in 2021 as anticipated.

**Problems anticipated**

There are some problems anticipated in the design of this study. First is the sample size. the research on the use of acupuncture to improve arterial elasticity is also insufficient. Therefore, there is no evidence to help set the sample size of this study. Second, the selection of blood indicators has insufficient evidence on improving atherosclerosis by acupuncture, we aim to explore the possible mechanism of acupuncture in improving arterial elasticity and to use the results as a basis to carry out further relevant study.

**Project management**

(I) Conception and design: P Zhou, JX Zhang; (II) Administrative support: WB Fu; (III) Provision of study materials or patients: JH Zhou, L Zhao; (IV) Collection and assembly of data: LC Meng, ST Ye, T Zhou; (V) Data analysis and interpretation: XC Huang, ZQ Qi; (VI) Drafting of manuscript: All authors; (VII) Final manuscript approval: All authors.

**Ethics**

Patients were recruited in Guangdong Provincial Hospital of Traditional Chinese Medicine with the approval of the local Clinical Ethics Committee (YF2019-071-01). Researchers have made sure every patient has a well-grounded understanding of the research contents and get informed consent before inclusion. All collected data from patients including photographs, hard-copy reports and spreadsheets are locked with limited access.

**Informed consent forms**

Informed consent forms are available in supplement file 6 with English translation.

**Research protocol: part 2**

**Budget**

The budget is mainly consisted of blood test fee, patients’ allowance, layout charges and materials expenses. All these are funded by Sanming Project of Medicine in Shenzhen (project number: SZSM201806077) and the Shenzhen Bao'an Research Centre for Acupuncture and Moxibustion (BAZJLCYJ2018239). The sponsors will not participate in the design, recruitment, implementation, data collection, analysis, writing, or publication.

**Other support for the project**

This study has not received any other public, commercial or for-profit funding.

**Collaboration with other scientists or research institutions**

None.

**Links to other projects**

None.

**Curriculum Vitae of investigators**

Wen-bin Fu, male, MD, chief physician, doctoral tutor of Guangzhou University of Chinese Medicine, the director of acupuncture department, the Second Affiliated Hospital of Guangzhou University of Chinese Medicine, the leader of Guangdong Acupuncture and Moxibustion Association, standing director of Chinese acupuncture and moxibustion societies.

**Other research activities of the investigators**

1. Key-Area Research and Development Program of Guangdong Province, Key Special Project of Lingnan Traditional Chinese Medicine Modernization, 2020B1111100007, Clinical and cognitive neural mechanism of "Soothing the liver and adjusting the Spirit" integrated acupuncture in the treatment of moderate depressive disorder, 2020/01-2024/12;

2. National Natural Science Foundation of China, 82074522, Study on the mechanism of acupuncture rapid anti-depression based on the prefrontal M1-ACH receptor regulation of glutamate/gamma-aminobutyric acid-mediated synaptic plasticity, 2021-01-2024/12;

**Financing and insurance**

None.
